# Supplementary material
Source: HighWire-hosted journal article supplement (https://jitc.bmj.com/content/9/1/e002025)

**Figure S3: PD-L1 immunohistochemistry of tumors.**

Anti-PD-L1 SP263 immunohistochemistry of NCI-H441, HCC827, MDA-MB-231 and MC38/hPD-L1 tumors. Tonsil was included as a positive control. Images are shown at 4, 20 and 40 X magnification.

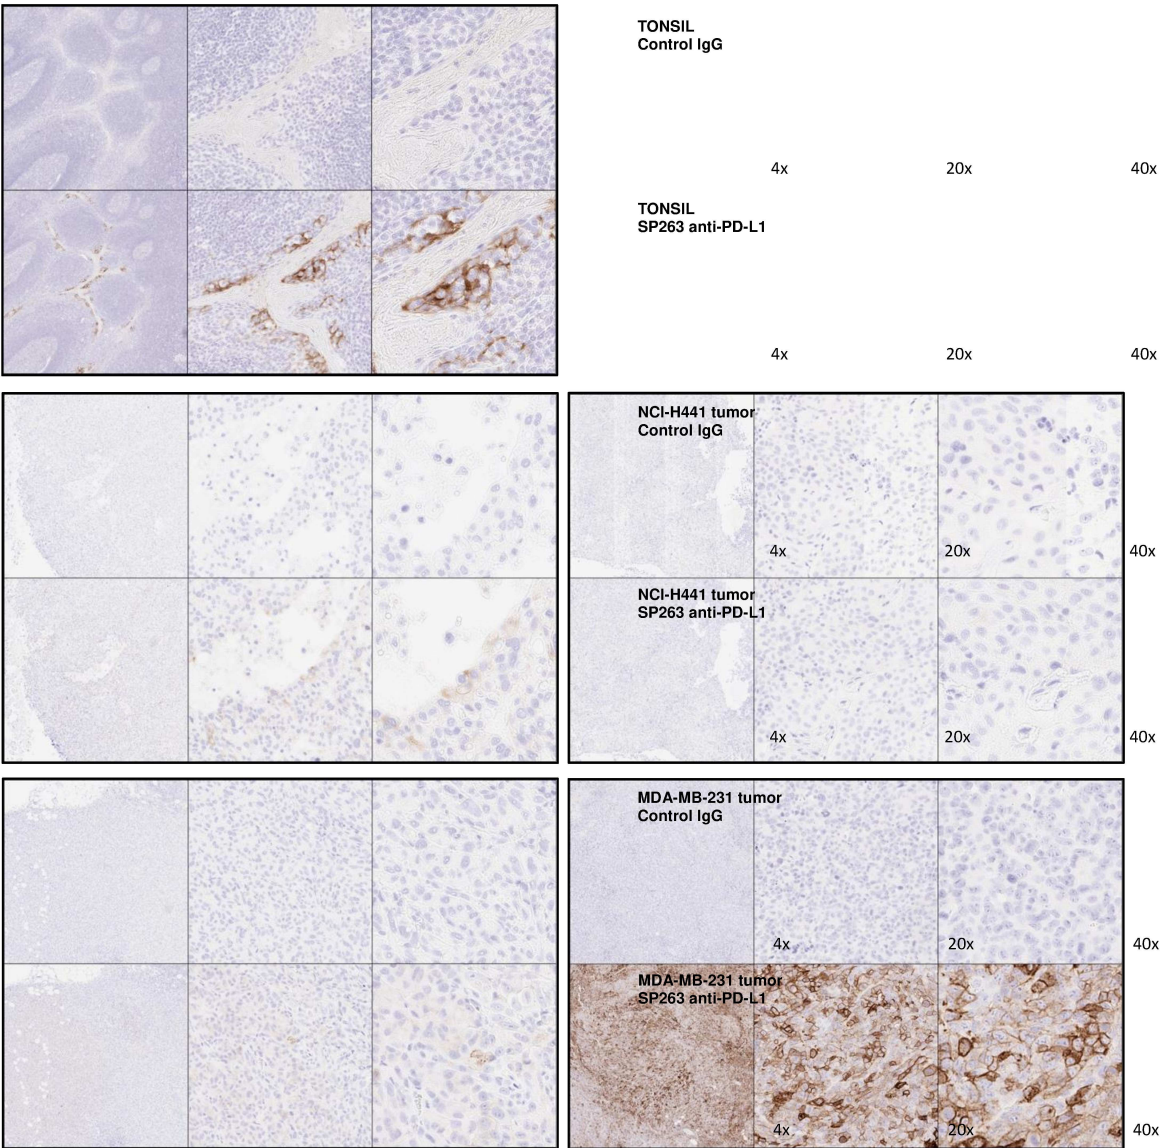

Supplement: inline-supplementary-material-5 [file inline-supplementary-material-5.pdf]
